# Supplementary material for: A meta-analysis establishes bromoform dose and forage-based models to evaluate the antimethanogenic effects of Asparagopsis spp. feed additive
Source: Research Square preprint supplement (doi:10.21203/rs.3.rs-7274271/v1), 2025-08-22
Supplement: Supplementary file 1 [file 01298c06bb1cf2939a73dd56.xlsx]

## Sheet: Data
Study	LeadAuthor	PublicationYear	Type	Breed	Lactating	Replicates	Group_n	Total_n	Treatment_vs._Control_n	Source	SourceRegion	Product	Form	Treatment	Species	OilType	Treatment_Days	CH4_Technology	mg_bromoform_kg_DM	DietNDF (kg/kg DMI)	DietCP (kg/kg/DMI)	DMI_kg	CH4_Yield	CH4Yield_difference	SEM_Yield
Roque2021_1	Roque	2021	Beef	AngusHereford	0	6	6	21	13	WildHarvest	Queensland		FreezeDried	Low	A.taxiformis		147	GreenFeed	35.2839	0.331	0.172	9.69	14.9	0.325792	1.02
Roque2021_1	Roque	2021	Beef	AngusHereford	0	7	7	21	13	WildHarvest	Queensland		FreezeDried	High	A.taxiformis		147	GreenFeed	70.5678	0.331	0.172	8.4	10.6	0.520362	1.02
Roque2021_1	Roque	2021	Beef	AngusHereford	0	7	7	21	7					Control	A.taxiformis		147	GreenFeed	0	0.331	0.172	10.3	22.1	0	1.02
Roque2021_2	Roque	2021	Beef	AngusHereford	0	6	6	21	14	WildHarvest	Queensland		FreezeDried	Low	A.taxiformis		147	GreenFeed	35.667	0.258	0.174	10.8	10.6	0.447917	1.36
Roque2021_2	Roque	2021	Beef	AngusHereford	0	7	7	21	14	WildHarvest	Queensland		FreezeDried	High	A.taxiformis		147	GreenFeed	71.334	0.258	0.174	9.99	3.92	0.795833	1.36
Roque2021_2	Roque	2021	Beef	AngusHereford	0	7	7	21	7					Control	A.taxiformis		147	GreenFeed	0	0.258	0.174	12.2	19.2	0	1.36
Roque2021_3	Roque	2021	Beef	AngusHereford	0	6	6	21	14	WildHarvest	Queensland		FreezeDried	Low	A.taxiformis		147	GreenFeed	36.3183	0.186	0.132	10.8	3.75	0.697581	1.02
Roque2021_3	Roque	2021	Beef	AngusHereford	0	7	7	21	14	WildHarvest	Queensland		FreezeDried	High	A.taxiformis		147	GreenFeed	72.6365	0.186	0.132	10.7	2.5	0.798387	1.02
Roque2021_3	Roque	2021	Beef	AngusHereford	0	7	7	21	7		Queensland			Control	A.taxiformis		147	GreenFeed	0	0.186	0.132	11.5	12.4	0	1.02
Kinley2020	Kinley	2020	Beef	BrahmanAngus	0	5	5	20	5					Control	A.taxiformis		90	RespirationChamber	0	0.306	0.155	9	11.09	0	0.62
Kinley2020	Kinley	2020	Beef	BrahmanAngus	0	5	5	20	15	WildHarvest	Australia		FreezeDried	Low	A.taxiformis		90	RespirationChamber	6.04565	0.306	0.155	8	10.04	0.0946799	0.62
Kinley2020	Kinley	2020	Beef	BrahmanAngus	0	5	5	20	15	WildHarvest	Australia		FreezeDried	Mid	A.taxiformis		90	RespirationChamber	12.0913	0.306	0.155	10.7	6.79	0.387737	0.62
Kinley2020	Kinley	2020	Beef	BrahmanAngus	0	5	5	20	15	WildHarvest	Australia		FreezeDried	High	A.taxiformis		90	RespirationChamber	24.1826	0.306	0.155	9.5	0.23	0.979261	0.62
Kinley2024	Kinley	2024	Beef	AngusShorthorn	0	15	150	300	150	Commercial	Tasmania		Oil	Control	A.armata	Canola	81	GreenFeed	0	0.315	0.125	11.05	8.70588	0	1.34842
Kinley2024	Kinley	2024	Beef	AngusShorthorn	0	15	150	300	150	Commerical	Tasmania	SeaForest	Oil	Treatment	A.armata	Canola	81	GreenFeed	35	0.315	0.125	10.76	3.66171	0.579398	1.38476
Roque2019	Roque	2020	DairyCow	Holstein	1	4	4	12	8	WildHarvest	Tasmania		FreezeDried	Low	A.armata		14	GreenFeed	12.1488	0.301	0.176	24.9	13.81	0.190978	1.89
Roque2019	Roque	2020	DairyCow	Holstein	1	4	4	12	8	WildHarvest	Tasmania		FreezeDried	High	A.armata		14	GreenFeed	24.2976	0.301	0.176	17.3	7.7	0.548916	1.89
Roque2019	Roque	2020	DairyCow	Holstein	1	4	4	12	4		Tasmania			Control	A.armata		14	GreenFeed	0	0.301	0.176	27.9	17.07	0	1.89
AlvarezHess2023	AlvarezHess	2023	DairyCow	HolsteinFriesian	1	13	13	39	26	Commercial	Tasmania	SeaFeed	Oil	ASP1	A.armata	Canola	20	SF6	19.9883	0.401	0.141	24	16.7	0.445183	2.11
AlvarezHess2023	AlvarezHess	2023	DairyCow	HolsteinFriesian	1	13	13	39	26	Commercial	Tasmania	SeaFeed	Oil	ASP2	A.armata	Canola	20	SF6	21.2367	0.391	0.136	22.6	20.4	0.322259	2.11
AlvarezHess2023	AlvarezHess	2023	DairyCow	HolsteinFriesian	1	13	13	39	13					Control	A.armata		20	SF6	0	0.398	0.141	24.7	30.1	0	2.11
Krizsan2023	Krizsan	2023	Dairy	NordicRed	1	6	3	12	3	Wild Harvest	Azores		FreezeDried	AT	A.taxiformis		21	GreenFeed	Redacted	0.396	0.189	17.5	9.2	0.515789	1.47
Krizsan2023	Krizsan	2023	Dairy	NordicRed	1	6	3	12	3					Control	A.taxiformis		21	GreenFeed	0	0.396	0.189	20.3	19	0	1.47
AlvarezHess2024	AlvarezHess	2024	DairyCow	HolsteinFriesian	1	6	6	30	6					Control	A.armata		37	SF6	0	0.35	0.187	22.7	25.6	0	1.81
AlvarezHess2024	AlvarezHess	2024	DairyCow	HolsteinFriesian	1	6	6	30	24	Commercial	Tasmania	SeaFeed	Oil	Asp1	A.armata	Canola	37	SF6	5.89286	0.35	0.187	22.4	23.8	0.0703125	1.81
AlvarezHess2024	AlvarezHess	2024	DairyCow	HolsteinFriesian	1	6	6	30	24	Commercial	Tasmania	SeaFeed	Oil	Asp2	A.armata	Canola	37	SF6	11.6157	0.353	0.188	22.9	22.4	0.0588235	1.81
AlvarezHess2024	AlvarezHess	2024	DairyCow	HolsteinFriesian	1	6	6	30	24	Commercial	Tasmania	SeaFeed	Oil	Asp3	A.armata	Canola	37	SF6	19.0431	0.345	0.187	20.9	20.2	0.0982143	1.81
AlvarezHess2024	AlvarezHess	2024	DairyCow	HolsteinFriesian	1	6	6	30	24	Commercial	Tasmania	SeaFeed	Oil	Asp4	A.armata	Canola	37	SF6	20.8696	0.35	0.187	20.7	16.3	0.193069	1.81
Eikanger2024	Eikanger	2024	DairyCow	NordicRed	1	5	5	15	5		Azores			Control	A.taxiformis		39	SF6	0	0.401	0.175	22.9	25	0	1.41
Eikanger2024	Eikanger	2024	DairyCow	NordicRed	1	5	5	15	10	WildHarvest	Azores		FreezeDried	Low	A.taxiformis		39	SF6	5.23892	0.401	0.175	22	22.4	0.104	1.41
Eikanger2024	Eikanger	2024	DairyCow	NordicRed	1	5	5	15	10	WildHarvest	Azores		FreezeDried	High	A.taxiformis		39	SF6	10.4778	0.401	0.175	19.2	20.9	0.164	1.41
Cowley2024	Cowley	2024	Heifer	Angus	0	5	5	20	5					Control	A.armata		59	RespirationChamber	0	0.28	0.114	10.1	20.9	0	0.211329
Cowley2024	Cowley	2024	Heifer	Angus	0	5	5	20	15	Commercial	Tasmania	SeaFeed	Oil	Low	A.armata	Canola	59	RespirationChamber	17	0.28	0.114	9.29	3.5	0.832536	0.211329
Cowley2024	Cowley	2024	Heifer	Angus	0	5	5	20	15	Commercial	Tasmania	SeaFeed	Oil	Medium	A.armata	Canola	59	RespirationChamber	34	0.28	0.114	8.85	0.2	0.990431	0.211329
Cowley2024	Cowley	2024	Heifer	Angus	0	5	5	20	15	Commercial	Tasmania	SeaFeed	Oil	High	A.armata	Canola	59	RespirationChamber	51	0.28	0.114	9.6	0.1	0.995215	0.211329
Williams2024_1	Williams	2024	Dairy	HolsteinFriesian	1	10	10	40	10					Control_Liquid	A.armata		34	SF6	0	0.35909	0.189139	25.1	21.4	0	0.6
Williams2024_2	Williams	2024	Dairy	HolsteinFriesian	1	10	10	40	10					Control_Pellet	A.armata		34	SF6	0	0.358292	0.189056	24.8	20	0	0.6
Williams2024_1	Williams	2024	Dairy	HolsteinFriesian	1	10	10	40	10	Commercial	Tasmania	SeaFeed	Oil	Liquid	A.armata	Canola	34	SF6	11.92	0.358826	0.189112	25	15.7	0.266355	0.6
Williams2024_2	Williams	2024	Dairy	HolsteinFriesian	1	10	10	40	10	Commercial	Tasmania	SeaFeed	Oil	Pellet	A.armata	Canola	34	SF6	12.4681	0.354602	0.188672	23.5	17.1	0.145	0.6
George2024	George	2024	Beef	Angus	0	80	80	160	80	Commercial			Oil	Control	A.armata	Canola	200	GreenFeed	0	0.207	0.1435	11.3357	11.86	0	0.389
George2024	George	2024	Beef	Angus	0	80	80	160	80	Commercial	Tasmania	SeaFeed	Oil	SeaFeed	A.armata	Canola	200	GreenFeed	25.06	0.207	0.1435	11.2914	5.87	0.505	0.389
Angellotti2025	Angellotti	2025	Dairy	NordicRed	1	10	10	30	10					Control	A.taxiformis		84	GreenFeed	0	0.53	0.185	24.9	17.4	0	0.7
Angellotti2025	Angellotti	2025	Dairy	NordicRed	1	10	10	30	20	WildHarvest	Azores		FreezeDried	Low	A.taxiformis		84	GreenFeed	10	0.53	0.185	24.7	16.4	0.0869565	0.7
Angellotti2025	Angellotti	2025	Dairy	NordicRed	1	10	10	30	20	WildHarvest	Azores		FreezeDried	High	A.taxiformis		84	GreenFeed	20.7	0.53	0.185	23.1	11.5	0.513043	0.7

## Sheet: Data Dictionary
Variable	Description
Study
LeadAuthor
PublicationYear
Type
Breed
Lactating
Replicates
Group_n
Total_n
Treatment_n
Source
SourceRegion
Product
Form
Treatment
Species
OilType
Treatment_Days
FeedingIntensity
CH4_Technology
CarrierDose_g_day
CarrierDose_OMrate
BrCarrierConcentration
Carrier_g_kg_DM
mg_Br_animal_day
mg_bromoform_kg_DM
DietOM
DietNDF (kg/kg DMI)
DietCP (kg/kg/DMI)
DMI_kg
OMI_kg
CH4_Prod
SEM_Prod
CH4Prod_difference
CH4_Yield
CH4Yield_difference
SEM_Yield
